# Supplementary material for: Transcriptome analysis of two inflorescence branching mutants reveals cytokinin is an important regulator in controlling inflorescence architecture in the woody plant Jatropha curcas
Source: BMC Plant Biol. 2019 Nov 4;19:468. doi: 10.1186/s12870-019-2069-3 (PMC6830001; doi:10.1186/s12870-019-2069-3)
Supplement: Supplementary file 6 — Additional file 6. Differentially expressed genes with opposite expression patterns in inflorescences between pairwise dxhII_ckII and gII_dxhII. [file 12870_2019_2069_MOESM6_ESM.xlsx]

## Sheet: Sheet1
Additional file 6 Differentially expressed genes with opposite expression patterns in inflorescences between pairwise dxhII_ckII and gII_dxhII.
	ckII_ckI			dxhII_dxhI			dxhI_ckI			dxhII_ckII			gII_ckII			gII_dxhII			Homologs	Blastx_results
Transcript ID	logFC	logCPM	FDR	logFC	logCPM	FDR	logFC	logCPM	FDR	logFC	logCPM	FDR	logFC	logCPM	FDR	logFC	logCPM	FDR	Gene ID	Pident	Length	Evalue	Bitscore	Annotation
CD14435.0	7.10015	0.906326	6.45118e-09	4.77746	0.906326	0.0498038	0	0.906326	1	-2.32269	0.906326	0.0116875	3.17424	0.906326	5.42007e-11	5.49693	0.906326	7.78673e-22	AT5G39090	0.43	448	1e-101	367	HXXXD-type acyl-transferase family protein
CD18775.0	2.98393	0.60716	0.000937222	4.08022	0.60716	0.196639	-3.22827	0.60716	0.221672	-2.13197	0.60716	0.053727	3.77723	0.60716	2.62831e-21	5.90921	0.60716	2.01478e-33	AT3G54940	0.68	367	1e-143	504	Papain family cysteine protease
CD20660.0	2.29615	1.88956	0.132376	0	1.88956	1	-4.47243	1.88956	0.079536	-6.76858	1.88956	0.00321112	4.66062	1.88956	7.54008e-05	11.4292	1.88956	4.24378e-11	AT3G23240	0.54	218	3e-32	135	ERF1, ATERF1 | ethylene response factor 1
CD29351.0	2.48701	0.102151	5.41501e-05	2.24134	0.102151	0.0835996	-1.27261	0.102151	0.357331	-1.51828	0.102151	0.0549464	1.48168	0.102151	0.000209998	2.99996	0.102151	1.24887e-11	AT3G47570	0.34	1010	1e-146	516	Leucine-rich repeat protein kinase family protein
CD29628.1	-1.65869	1.82203	0.0219821	-0.610595	1.82203	0.865483	-3.23683	1.82203	7.05731e-06	-2.18873	1.82203	0.0286622	1.82433	1.82203	0.00257652	4.01306	1.82203	1.37739e-09	AT5G55930	0.59	755	0	938	OPT1 | oligopeptide transporter 1
CD37354.0	-1.44355	4.20457	0.0891724	-0.0297365	4.20457	1	-3.57186	4.20457	8.33421e-06	-2.15805	4.20457	0.0460374	1.93348	4.20457	0.00466764	4.09153	4.20457	1.86466e-08	AT3G51860	0.59	459	1e-137	485	CAX3|cation exchanger 3
CD41867.0	0.302209	4.1237	0.471169	0.0321012	4.1237	0.994165	-0.633633	4.1237	0.109887	-0.903741	4.1237	0.0423737	1.13967	4.1237	4.18003e-05	2.04341	4.1237	2.36417e-13	AT5G05730	0.69	501	0	692	AMT1｜ammonium transporter 1 Encodes a plasma membrane localized ammonium transporter. Contains a cytosolic trans-activation domain essential for ammonium uptake. The mRNA is cell-to-cell mobile.
CD42092.0	1.18098	1.98572	0.0484452	0.643155	1.98572	0.760857	-1.02511	1.98572	0.17258	-1.56294	1.98572	0.0410265	1.80135	1.98572	9.33236e-05	3.36429	1.98572	4.80732e-12	AT1G78780	0.49	238	6e-62	234	pathogenesis-related family protein
CD43243.0	-0.675052	1.60093	0.385313	0.621569	1.60093	0.864306	-3.30242	1.60093	2.2854e-06	-2.0058	1.60093	0.0282576	2.24597	1.60093	3.33253e-05	4.25177	1.60093	1.02184e-12	AT3G18440	0.54	598	1e-158	555	ALMT9｜aluminum-activated malate transporter 9 Belongs to the aluminum-activated malate transporter family. Encodes a vacuolar malate channel. Expressed in all parts of plants. Almost exclusively expressed in mesophyll cells of leaves. The mRNA is cell-to-cell mobile.
CD44142.2	1.93707	5.86528	2.63855e-10	0.765135	5.86528	0.140007	0.263886	5.86528	0.606707	-0.908051	5.86528	0.0460157	1.3154	5.86528	4.42624e-06	2.22345	5.86528	9.26832e-15	AT5G09360	0.47	569	1e-150	527	LAC14 | laccase 14
CD48702.0	-0.92865	0.33061	0.343505	-2.39931	0.33061	0.50757	-2.69266	0.33061	0.0073591	-4.16331	0.33061	0.00787698	3.41571	0.33061	3.14753e-07	7.57902	0.33061	8.18665e-16	AT1G49570	0.66	350	1e-112	401	Peroxidase superfamily protein
CD48882.0	-2.00144	4.64603	0.00203021	-0.510011	4.64603	0.864624	-3.6739	4.64603	9.7898e-09	-2.18247	4.64603	0.00651231	2.71833	4.64603	1.92165e-06	4.90079	4.64603	2.18609e-15	AT3G26210	0.36	501	3e-79	293	cytochrome P450
CD49117.1	-0.652521	2.81816	0.177959	-0.173923	2.81816	0.914161	3.49503	2.81816	2.93261e-32	3.97363	2.81816	2.38255e-37	-1.46506	2.81816	0.000804751	-5.43869	2.81816	1.85897e-59	AT5G53900	0.39	377	1e-25	113	Serine/threonine-protein kinase WNK (With No Lysine)-related
CD49571.1	-1.81828	2.26393	1.33863e-08	-0.103247	2.26393	0.970161	-0.67468	2.26393	0.0893536	1.04035	2.26393	0.0261307	-1.36242	2.26393	7.81367e-05	-2.40277	2.26393	8.75277e-14	AT1G77120	0.75	379	1e-172	600	ADH1 | alcohol dehydrogenase 1
CD50568.0	1.00681	1.05672	0.12549	-0.312996	1.05672	0.939403	-0.533799	1.05672	0.56694	-1.8536	1.05672	0.0166157	1.41388	1.05672	0.0030362	3.26749	1.05672	2.06833e-10	AT3G44250	0.52	499	3e-33	138	CYP71B38 | cytochrome P450
CD50919.0	0.817947	3.9267	0.0193779	0.4426	3.9267	0.677435	-1.22567	3.9267	0.000493406	-1.60102	3.9267	2.37052e-06	1.13589	3.9267	6.34936e-05	2.73691	3.9267	3.34183e-21	AT3G19000	0.58	352	1e-115	410	2-oxoglutarate (2OG) and Fe(II)-dependent oxygenase superfamily protein
CD53029.3975	2.02498	1.0032	0.0417044	-0.717111	1.0032	0.886791	0.0129979	1.0032	1	-2.7291	1.0032	0.0355909	2.27013	1.0032	0.00263683	4.99923	1.0032	6.25557e-09	AT5G17540	0.49	461	1e-41	165	HXXXD-type acyl-transferase family protein
CD53522.0	2.13846	3.79343	0.0690395	0.249563	3.79343	0.979703	-1.21673	3.79343	0.415403	-3.10563	3.79343	0.0411343	3.19296	3.79343	0.000923814	6.29858	3.79343	8.86925e-09	AT4G27410	0.69	297	6e-99	357	RD26| NAC (No Apical Meristem) domain transcriptional regulator superfamily protein
CD35911.0	0.359224	-0.795549	0.754944	-0.939056	-0.795549	0.928402	-3.10495	-0.795549	0.0128303	-4.40323	-0.795549	0.00121653	1.57396	-0.795549	0.010476	5.97718	-0.795549	9.40414e-11	lncRNA					ncRNA
CD37832.1	-2.87836	2.72762	0.00466725	-1.27378	2.72762	0.704	-4.62428	2.72762	1.31083e-05	-3.0197	2.72762	0.0367892	2.70133	2.72762	0.00201278	5.72103	2.72762	1.09039e-08	lncRNA					ncRNA
CD39325.1	0.361766	2.54606	0.565411	0.971921	2.54606	0.326557	-2.06383	2.54606	3.71076e-05	-1.45368	2.54606	0.0191977	0.971238	2.54606	0.0187653	2.42492	2.54606	6.84918e-09	lncRNA					ncRNA
CD47611.19	6.33706	-0.325228	0.00153884	0	-0.325228	1	0	-0.325228	1	-6.33706	-0.325228	0.00889362	2.49002	-0.325228	0.0260795	8.82708	-0.325228	1.69121e-07	lncRNA					ncRNA
CD48377.0	0.935451	0.118074	0.372911	1.80037	0.118074	0.735479	-3.90496	0.118074	0.00664812	-3.04003	0.118074	0.0179914	2.32301	0.118074	0.00063568	5.36304	0.118074	1.16606e-10	lncRNA					ncRNA
CD48841.0	0.342304	3.26882	0.665435	0.795686	3.26882	0.639451	-2.20503	3.26882	0.000251696	-1.75164	3.26882	0.0191977	1.68289	3.26882	0.000697354	3.43453	3.26882	3.71515e-11	lncRNA					ncRNA
CD53029.1529	1.07273	4.27517	0.0570171	1.15538	4.27517	0.1931	-1.53891	4.27517	0.00765183	-1.45626	4.27517	0.0401788	2.19254	4.27517	1.21102e-06	3.6488	4.27517	8.23037e-15	lncRNA					ncRNA
CD53029.3365	1.05366	5.00331	0.0442639	1.0629	5.00331	0.19604	-1.5509	5.00331	0.00300321	-1.54165	5.00331	0.0111995	2.04995	5.00331	1.31938e-06	3.59161	5.00331	3.24462e-16	lncRNA					ncRNA
CD53029.506	0.793843	4.26941	0.131485	1.17072	4.26941	0.0932402	-1.63652	4.26941	0.000827059	-1.25964	4.26941	0.0513793	1.47163	4.26941	0.000265975	2.73127	4.26941	3.09763e-11	lncRNA					ncRNA
CD53029.968	0.68032	3.00997	0.308075	1.01962	3.00997	0.401641	-1.89214	3.00997	0.00176247	-1.55284	3.00997	0.0411343	1.53026	3.00997	0.00137374	3.08311	3.00997	4.75852e-10	lncRNA					ncRNA
ckII_ckI indicates the pairwise stageII vs. stageI in wild plant; dxhII_dxhI indicates the stageII vs. stageI in dxh mutant; dxhI_ckI indicates the dxh vs. wild inflorescences at stage I; dxhII_ckII indicates the dxh vs. wild inflorescences at stage II, and gII_dxhII indicates the g vs. dxh inflorescences at stage II.
FC, fold changes; CPM, counts per million; FDR, false discovery rate.
